# Supplementary material for: Genetic variation in the social environment affects behavioral phenotypes of oxytocin receptor mutants in zebrafish
Source: eLife. 2020 Sep 9;9:e56973. doi: 10.7554/eLife.56973 (PMC7481002; doi:10.7554/eLife.56973)
Supplement: Figure 1—source data 3. [file elife-56973-fig1-data3.xlsx]

## Sheet: Fig. 1F
Article: Genetic variation in the social environment affects behavioral phenotypes of oxytocin receptor mutants
Figure 1F
		Social Environment Genotype
		Wild-type	OxtR mutant
Individual Genotype	Wild-type	0.359571	0.449951
		0.507558	0.410602
		0.60822	0.522003
		0.722006	0.552284
		0.887881	0.876546
		0.549818	0.672064
		0.681945	0.805325
		0.509231	0.67652
		0.650706	0.486149
		0.828459
		0.634786
		0.439035
		0.579233
		0.616835
		0.684612
	OxtR mutant	0.574138	0.116841
		0.66339	0.752153
		0.376194	0.331932
		0.523814	0.501411
		0.687327	0.582013
		0.524256	0.192966
		0.375678	0.392966
		0.35621	0.812186
		0.328416	0.472889
			0.70906
			0.552177
			0.381557
			0.20257
			0.550713
			0.320857
