# Supplementary material for: Genetic variation in the social environment affects behavioral phenotypes of oxytocin receptor mutants in zebrafish
Source: eLife. 2020 Sep 9;9:e56973. doi: 10.7554/eLife.56973 (PMC7481002; doi:10.7554/eLife.56973)
Supplement: Figure 1—source data 4. [file elife-56973-fig1-data4.xlsx]

## Sheet: Fig. 1H
Article: Genetic variation in the social environment affects behavioral phenotypes of oxytocin receptor mutants
Figure 1H
		Social Environment Genotype
		Wild-type	OxtR mutant
Individual Genotype	Wild-type	137.071	104.31
		108.211	102.825
		127.715	113.739
		131.53	144.453
		125.48	106.145
		99.0512	179.51
		100.609	80.013
		108.083	79.0962
		75.7274	72.6314
		108.647
		80.4716
		124.332
		118.485
		94.8062
		94.559
	OxtR mutant	93.2014	54.2444
		88.2334	51.4739
		105.574	52.8591
		148.014	130.129
		106.949	39.3185
		112.039	39.7523
		61.1288	39.947
		59.0835	45.2329
		61.5085	45.0718
			44.0344
			35.0571
			42.2017
			36.7822
			58.876
			40.7091
