# Supplementary material for: Genetic variation in the social environment affects behavioral phenotypes of oxytocin receptor mutants in zebrafish
Source: eLife. 2020 Sep 9;9:e56973. doi: 10.7554/eLife.56973 (PMC7481002; doi:10.7554/eLife.56973)
Supplement: Figure 1—source data 5. [file elife-56973-fig1-data5.xlsx]

## Sheet: Fig. 1J
Article: Genetic variation in the social environment affects behavioral phenotypes of oxytocin receptor mutants
Figure 1J
		Social Environment Genotype
		Wild-type	OxtR mutant
Individual Genotype	Wild-type	766.667	393.16
		346.926	310.04
		547.742	375.389
		518.058	249.264
		536.754	434.841
		118.954	537.934
		410.873	354.476
		545.891	473.981
		415.815	332.885
		562.075
		411.146
		553.778
		392.23
		457.526
		486.611
	OxtR mutant	429.303	314.354
		483.863	268.119
		347.142	291.237
		811.367	437.273
		412.627	256.368
		700.096	213.356
		290.962	219.713
		283.236	156.421
		370.521	262.489
			239.828
			164.206
			234.971
			43.1876
			307.026
			188.442
